# Supplementary material for: Comparison of estradiol hemihydrate 10 µg vaginal tablets versus vaginal gel in postmenopausal women with vaginal atrophy: A randomized crossover study
Source: Research Square preprint supplement (doi:10.21203/rs.3.rs-6530246/v1), 2025-06-03
Supplement: Supplementary file 1 [file 0f0b6d98fd48e1d091f7a471.docx]

**Table 4 Changes in female sexual function index (FSFI) domains over time**

| Comparison of change in domain of FSFI | Group 1  N = 17 | Group 2  N = 18 | Mean difference | 95% CI of difference | *P* value |
| --- | --- | --- | --- | --- | --- |
| Total score   - Baseline - Week 12 - Week 24   *P* value | 15.66 ± 6.83  18.05 ± 8.21  17.56 ± 8.85  0.271 | 15.54 ± 5.30  18.42 ± 6.25  18.82 ± 6.43  0.071 | -0.11  0.36  1.26 | -4.31 to 4.08  -4.63 to 5.36  -4.04 to 6.56 | 0.956  0.883  0.632 |
| Desire   - Baseline - Week 12 - Week 24   *P* value | 2.61 ± 1.19  2.75 ± 1.18  2.96 ± 1.25  0.403 | 2.33 ± 0.97  2.79 ± 0.82  2.75 ± 1.26  0.097 | -028  -0.035  -0.21 | -1.04 to 0.48  -0.68 to 0.75  -1.09 to 0.66 | 0.456  0.920  0.625 |
| Arousal   - Baseline - Week 12 - Week 24   *P* value | 2.38 ± 1.51  2.91 ± 1.76  3.26 ± 1.37  0.027 | 2.33 ± 1.13  2.75 ± 1.22  3.04 ± 1.34  0.132 | -0.05  -0.16  -0.23 | -0.99 to 0.88  -1.22 to 0.90  -1.18 to 0.72 | 0.909  0.762  0.626 |
| Lubrication   - Baseline - Week 12 - Week 24   *P* value | 2.31 ± 1.30  2.42 ± 1.43  2.26 ± 1.19  0.893 | 2.38 ± 1.01  2.37 ± 1.20  2.67 ± 0.97  0.631 | 0.07  -0.05  0.40 | -0.75 to 0.89  -0.98 to 0.87  -0.35 to 1.17 | 0.861  0.908  0.284 |
| Orgasm   - Baseline - Week 12 - Week 24   *P* value | 2.68 ± 1.47  2.64 ± 1.61  2.94 ± 1.59  0.657 | 2.92 ± 1.23  2.87 ± 1.44  2.97 ± 1.54  0.979 | 0.24  0.24  0.24 | -0.71 to 1.18  -0.83 to 1.31  -1.06 to 1.11 | 0.616  0.657  0.965 |
| Satisfaction   - Baseline - Week 12 - Week 24   *P* value | 3.22 ± 1.58  3.67 ± 1.61  3.98 ± 1.43  0.053 | 3.04 ± 1.05  3.88 ± 1.07  3.81 ± 1.13  0.016 | -0.19  0.21  -0.16 | -1.12 to 0.75  -0.74 to 1.17  -1.07 to 0.74 | 0.685  0.654  0.712 |
| Pain   - Baseline - Week 12 - Week 24   *P* value | 2.35 ± 1.47  1.94 ± 1.94  3.37 ± 1.90  0.043 | 2.80 ± 1.52  3.81 ± 1.99  3.67 ± 2.07  0.032 | 0.45  0.87  0.31 | -0.60 to 1.49  -0.50 to 2.24  -1.08 to 1.70 | 0.390  0.206  0.657 |

Data are presented as mean with standard deviation.
Comparisons were made using repeated-measures ANOVA for within-group and between-group comparisons.
Group 1: tablet → gel; Group 2: gel → tablet
