# Supplementary material for: Comparison of estradiol hemihydrate 10 µg vaginal tablets versus vaginal gel in postmenopausal women with vaginal atrophy: A randomized crossover study
Source: Research Square preprint supplement (doi:10.21203/rs.3.rs-6530246/v1), 2025-06-03
Supplement: Supplementary file 2 [file 4a5fe0e5a4a1ed5007fb4a1b.docx]

**Table 1 Demographic and baseline characteristics of study participants**

| Characteristics | Group 1 (n = 45) | Group 2 (n = 45) | *P* value |
| --- | --- | --- | --- |
| Age (years) | 60.29 ± 6.54 | 58.84 ± 6.71 | 0.304 |
| Body mass index (kg/m2) | 24.30 ± 3.67 | 23.89 ± 4.00 | 0.615 |
| Education   - Undergraduate - Bachelor’s degree - Master’s degree | 25 (55.6%)  18 (40.0%)  2 (4.4%) | 21 (46.7%)  24 (53.3%)  0 (0%) | 0.201 |
| Age at menopause | 48.89 ± 4.36 | 49.27 ± 4.59 | 0.690 |
| Menopause   - Natural - Surgical | 39 (86.7%)  6 (13.3%) | 39 (86.7%)  6 (13.3%) | 1.000 |
| Time since menopause   - < 5 years - 5-10 years - 10 years | 7 (15.6%)  18 (40%)  20 (44.4%) | 14 (31.1%)  13 (28.9%)  18 (40%) | 0.197 |
| Hysterectomy | 6 (13.3%) | 6 (13.3%) | 1.000 |
| Parity   - Nulliparous - Multiparous | 8 (17.8%)  37 (82.2%) | 10 (22.2%)  35 (77.8%) | 0.598 |
| Sexually active | 17 (37.8%) | 18 (40%) | 0.829 |

Data are presented as mean with standard deviation, median (range), or n (%).

Comparisons were made using Student’s *t* test for continuous variables and the chi-square test for categorical variables.
