# Supplementary material for: Comparison of estradiol hemihydrate 10 µg vaginal tablets versus vaginal gel in postmenopausal women with vaginal atrophy: A randomized crossover study
Source: Research Square preprint supplement (doi:10.21203/rs.3.rs-6530246/v1), 2025-06-03
Supplement: Supplementary file 3 [file 6fe41885427928b788b596b5.docx]

**Table 2 Most bothersome symptom at baseline**

| Most bothersome symptom | Group 1  N = 45 | Group 2  N = 45 | *P* value |
| --- | --- | --- | --- |
| Dryness  Soreness  Irritation  Discharge  Dyspareunia | 28 (62.2%)  3 (6.7%)  1 (2.2%)  0 (0%)  13 (28.9%) | 25 (55.6%)  4(8.9%)  1 (2.2%)  0 (0%)  15 (31.1%) | 0.929 |

Data are presented as n (%).
Comparisons were made using the chi-square test for categorical variables.
