# Supplementary material for: Comparison of estradiol hemihydrate 10 µg vaginal tablets versus vaginal gel in postmenopausal women with vaginal atrophy: A randomized crossover study
Source: Research Square preprint supplement (doi:10.21203/rs.3.rs-6530246/v1), 2025-06-03
Supplement: Supplementary file 4 [file ae55a0df3be15c3491483f72.docx]

**Table 3 Comparison of vaginal maturation index (VMI) between groups**

| VMI | Group 1 | Group 2 | *P* value |
| --- | --- | --- | --- |
| Parabasal cells   - Baseline - Week 12 - Week 24   *P* value | 59.00 (7.00,91.50)  0.00 (0.00, 9.25)  0.00 (0.00, 7.00)  < 0.001 | 39.00 (2.00, 82.00)  0.00 (0.00, 1.50)  0.00 (0.00, 3.25)  < 0.001 | 0.215  0.242  0.165 |
| Intermediate cells   - Baseline - Week 12 - Week 24   *P* value | 37.00 (8.50, 75.00)  65.50 (52.00, 87.25)  77.00 (58.00, 89.00)  < 0.001 | 55.00 (18.00, 78.00)  81.00 (64.00, 89.50)  82.00 (71.75, 92.50)  < 0.001 | 0.279  0.059  0.063 |
| Superficial cells   - Baseline - Week 12 - Week 24   *P* value | 0.00 (0.00, 7.00)  16.50 (3.25, 35.25)  14.00 (3.50, 28.50)  < 0.001 | 0.00 (0.00, 10.00)  15.00 (8.00, 35.00)  10.00 (5.00, 20.00)  < 0.001 | 0.698  0.734  0.606 |

Data are presented as median (interquartile range).
Comparisons were performed using the Mann–Whitney *U* test for between group analysis and the Friedman test for within-group analysis.
Group 1: tablet → gel; Group 2: gel → tablet
